# Supplementary material for: Impact of nucleic acid encapsulated MOF crystal phase on protein corona formation
Source: Royal Society of Chemistry journal article supplement (doi:10.1039/d3ma00391d), 2023-01-01
Supplement: d3ma00391d1.pdf [file d3ma00391d1.pdf]

## Supporting information for

# Impact of nucleic acid encapsulated MOF crystal phase on protein corona formation

Shakil Ahmed Polash,<sup>a,b</sup> Suneela Pyreddy,<sup>a,b</sup> Amanda N Abraham,<sup>a,c</sup> Sanje Mahasivam,<sup>a,b</sup> Vipul Bansal,<sup>a,b</sup> Linda Varadi,<sup>d</sup> Gary Bryant<sup>a</sup> and Ravi Shukla<sup>\*a,b,e</sup>

<sup>a</sup> School of Science, RMIT University, Melbourne, Victoria 3001, Australia.

<sup>b</sup> Sir Ian Potter NanoBiosensing Facility, NanoBiotechnology Research Laboratory (NBRL), RMIT University, Melbourne, Victoria 3001, Australia.

<sup>c</sup> ARC Centre of Excellence for Nanoscale BioPhotonics, RMIT University, Melbourne, Victoria 3001, Australia.

<sup>d</sup> School of Engineering, RMIT University, Melbourne, Victoria 3001, Australia.

<sup>e</sup> Centre for Advanced Materials and Industrial Chemistry, RMIT University, Melbourne, Victoria 3001, Australia.

\* Correspondent: RS ([ravi.shukla@rmit.edu.au](mailto:ravi.shukla@rmit.edu.au))

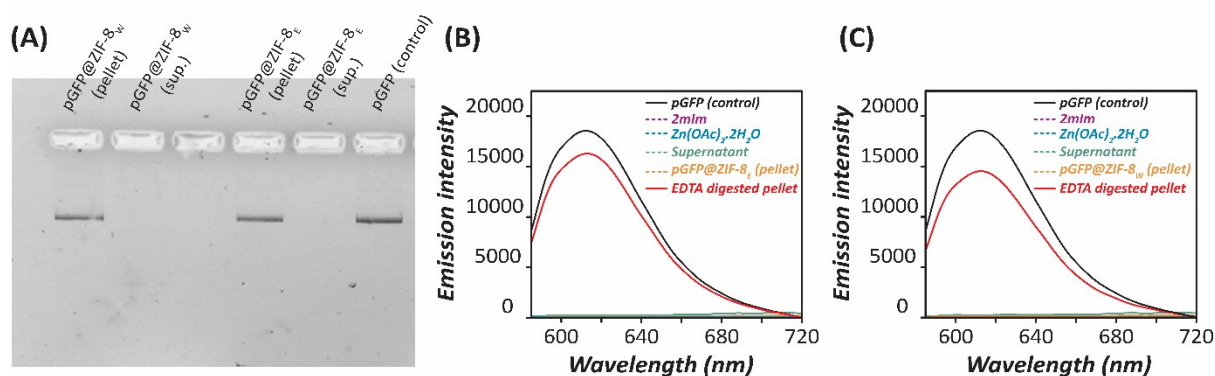

**Fig S1.** (A) Agarose gel electrophoresis image of the pGFP@ZIF-8<sub>w</sub>, pGFP@ZIF-8<sub>E</sub> pellet, supernatant and control pGFP. (B) Fluorescence spectroscopy of PI-added with the precursors, supernatant, pGFP@ZIF-8<sub>E</sub> pellet and EDTA-digested pellet. (C) Fluorescence spectroscopy of PI-added with the precursors, supernatant, pGFP@ZIF-8<sub>w</sub> pellet and EDTA-digested pellet.

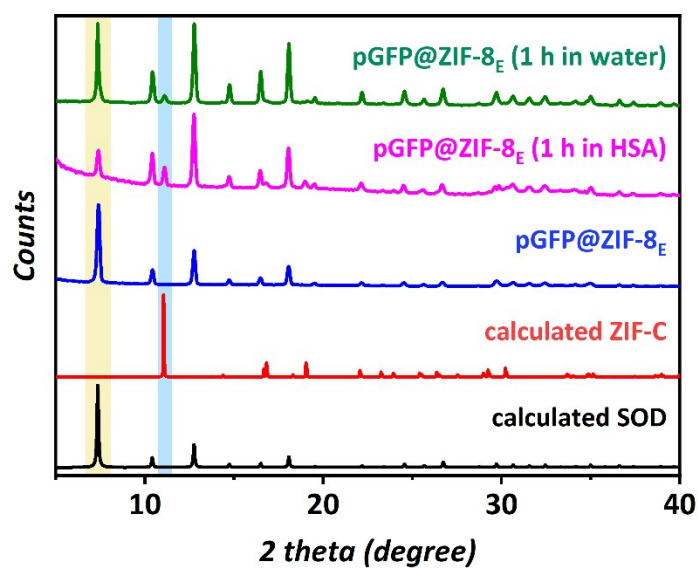

**Fig S2.** XRD of pGFP@ZIF-8<sub>E</sub> in as-prepared condition, 1h HSA treatment, and 1 h water treatment.

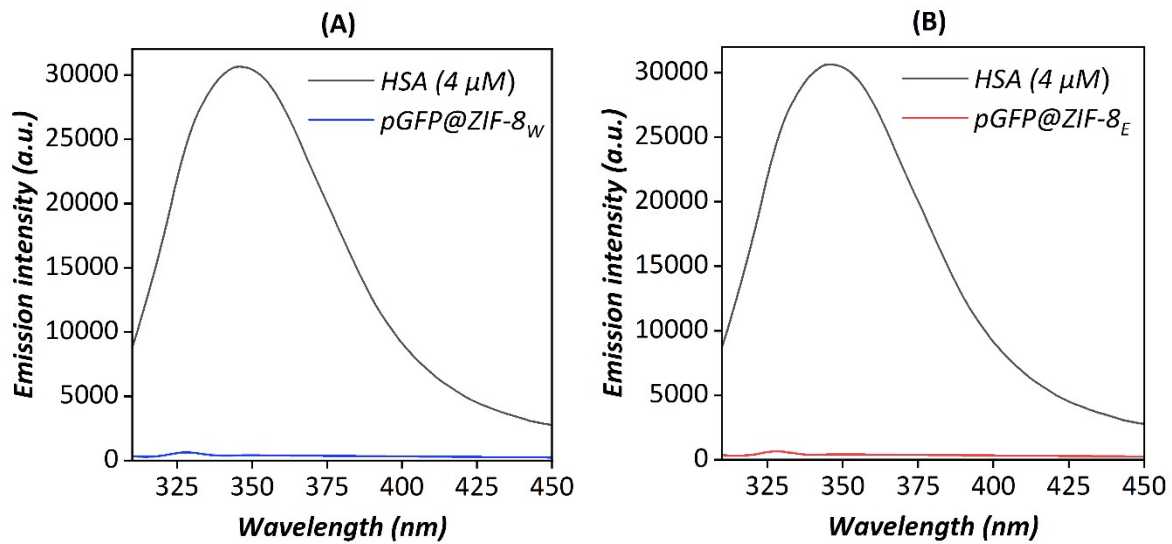

**Fig S3.** Fluorescence emission spectra of HSA molecules and untreated (A) pGFP@ZIF-8<sub>W</sub> and (B) pGFP@ZIF-8<sub>E</sub>.

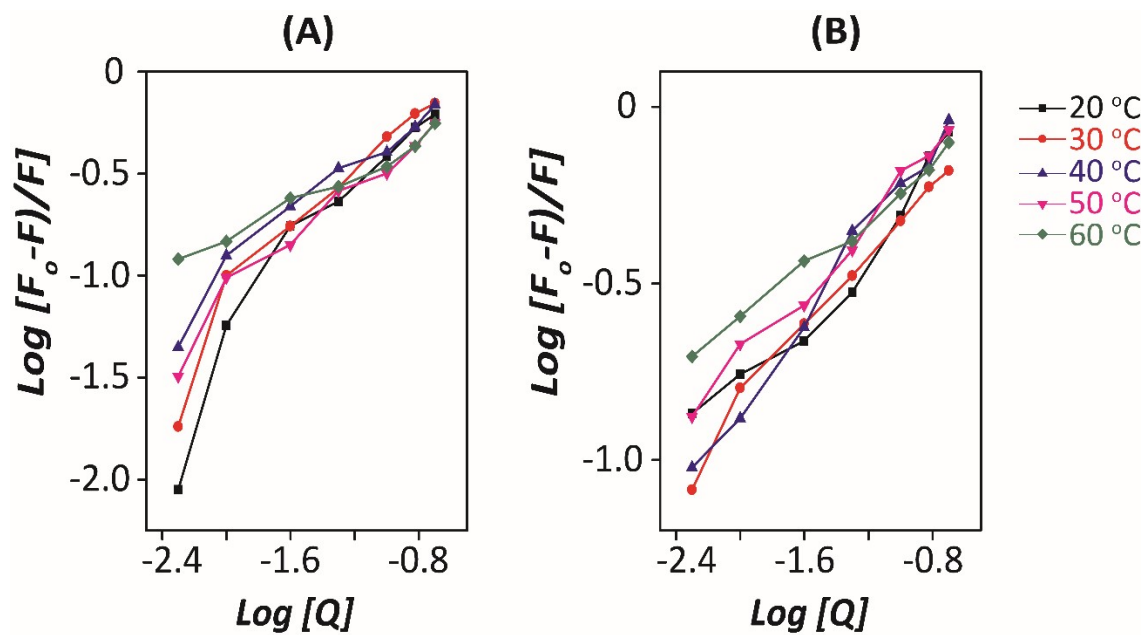

**Fig S4.** Double logarithmic regression plots of  $\log[(F_0-F)/F]$  vs.  $\log[Q]$  for binding of HSA with (A) pGFP@ZIF-8<sub>E</sub> and (B) pGFP@ZIF-8<sub>W</sub>.

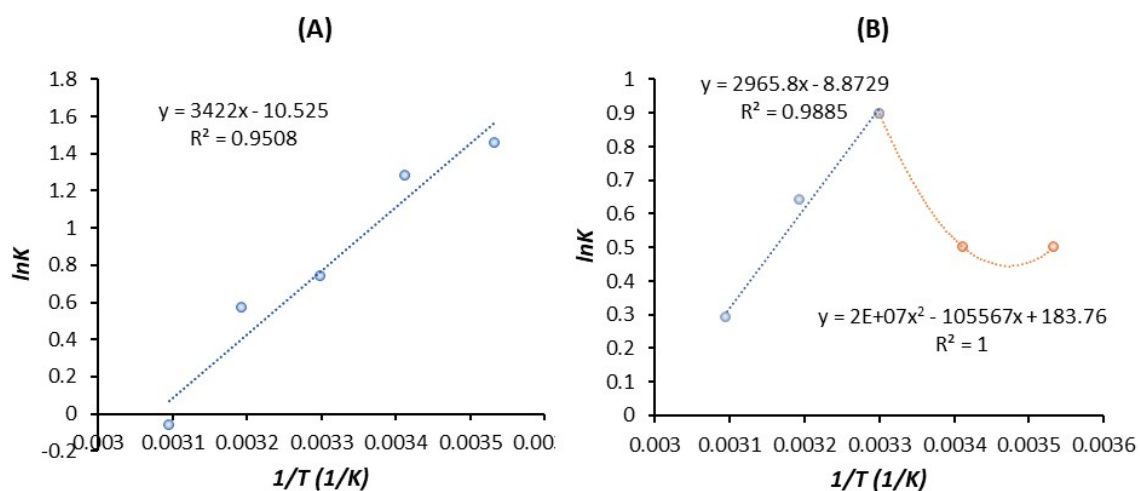

**Fig S5.** van't Hoff plot for (A) pGFP@ZIF-8<sub>E</sub>@HSA and (B) pGFP@ZIF-8<sub>W</sub>@HSA to determine interaction of ZIFs to HSA.

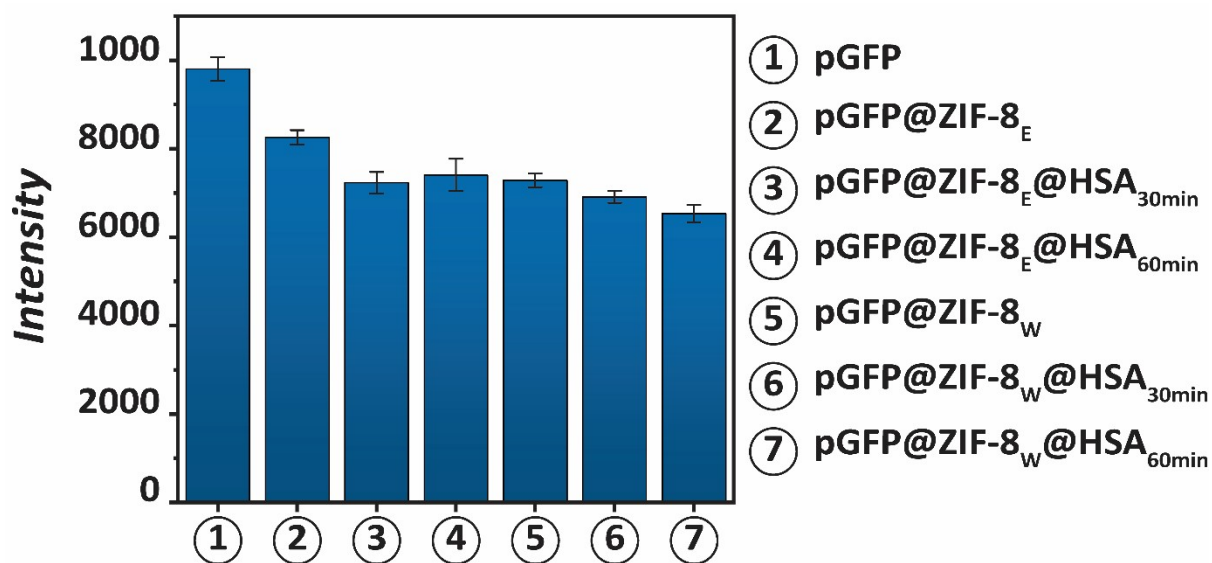

**Fig S6.** Protection of nucleic acid in the bio-composite after DNase treatment.

**Table S1.** Stern-Volmer constants and thermodynamic parameters for pGFP@ZIF-8<sub>E</sub>@HSA.

| Temp (°C) | K <sub>sv</sub> (M <sup>-1</sup> ) | K (M <sup>-1</sup> ) | n (M <sup>-1</sup> ) | ΔH° (J/mol) | ΔS° (J/mol) | ΔG° (kJ/mol) |
|-----------|------------------------------------|----------------------|----------------------|-------------|-------------|--------------|
| 20        | 3.03                               | 4.29                 | 1.03                 | 1.500       |             | 0.386        |
| 30        | 3.45                               | 3.60                 | 0.89                 | 0.679       |             | 0.398        |
| 40        | 2.96                               | 2.08                 | 0.66                 | 0.186       | -1.311      | 0.411        |
| 50        | 2.47                               | 1.76                 | 0.70                 | -0.150      |             | 0.423        |
| 60        | 2.03                               | 0.93                 | 0.39                 | -0.946      |             | 0.436        |

**Table S2.** Stern-Volmer constants and thermodynamic parameters for pGFP@ZIF-8<sub>W</sub>@HSA.

| Temp (°C) | K <sub>sv</sub> (M <sup>-1</sup> ) | K (M <sup>-1</sup> ) | n (M <sup>-1</sup> ) | ΔH° (J/mol)               | ΔS° (J/mol) | ΔG° (kJ/mol)             |
|-----------|------------------------------------|----------------------|----------------------|---------------------------|-------------|--------------------------|
| 20        | 3.73                               | 1.65                 | 0.50                 | -257.33 x 10 <sup>3</sup> | -409.11     | 129.61 x 10 <sup>3</sup> |
| 30        | 2.84                               | 1.65                 | 0.54                 | -219.87 x 10 <sup>3</sup> | -283.37     | 123.74 x 10 <sup>3</sup> |
| 40        | 3.99                               | 2.45                 | 0.62                 | -184.81 x 10 <sup>3</sup> | -169.49     | 127.87 x 10 <sup>3</sup> |
| 50        | 3.66                               | 1.90                 | 0.50                 | 1.176                     | -1.104      | 0.358                    |
| 60        | 2.84                               | 1.34                 | 0.36                 | 1.141                     |             | 0.369                    |
